# Supplementary material for: Eukaryotic Phytoplankton Contributing to a Seasonal Bloom and Carbon Export Revealed by Tracking Sequence Variants in the Western North Pacific
Source: PubMed Central journal article supplement (PMC6902033; doi:10.3389/fmicb.2019.02722), 2019-11-26
Supplement: Image_1.pdf [file Image_1.pdf]

*Supplementary Material for*

*Eukaryotic phytoplankton contributing to a seasonal bloom and carbon export  
revealed by tracking sequence variants in the western North Pacific*

**Takuhei Shiozaki<sup>1</sup>, Yuu Hirose<sup>2</sup>, Koji Hamasaki<sup>3</sup>, Ryo Kaneko<sup>4</sup>, Kazuo Ishikawa<sup>3</sup>, Naomi Harada<sup>1</sup>**

<sup>1</sup> Earth Surface System Research Center, Japan Agency for Marine-Earth Science and Technology, Yokosuka, Japan

<sup>2</sup> Department of Applied Chemistry and Life Science, Toyohashi University of Technology, Aichi, Japan

<sup>3</sup> Atmosphere and Ocean Research Institute, The University of Tokyo, Chiba, Japan

<sup>4</sup> Arctic Environment Research Center, National Institute of Polar Research, Tachikawa, Tokyo, Japan

**Contents of this file**

Figures S1, S2, S3, S4, and S5

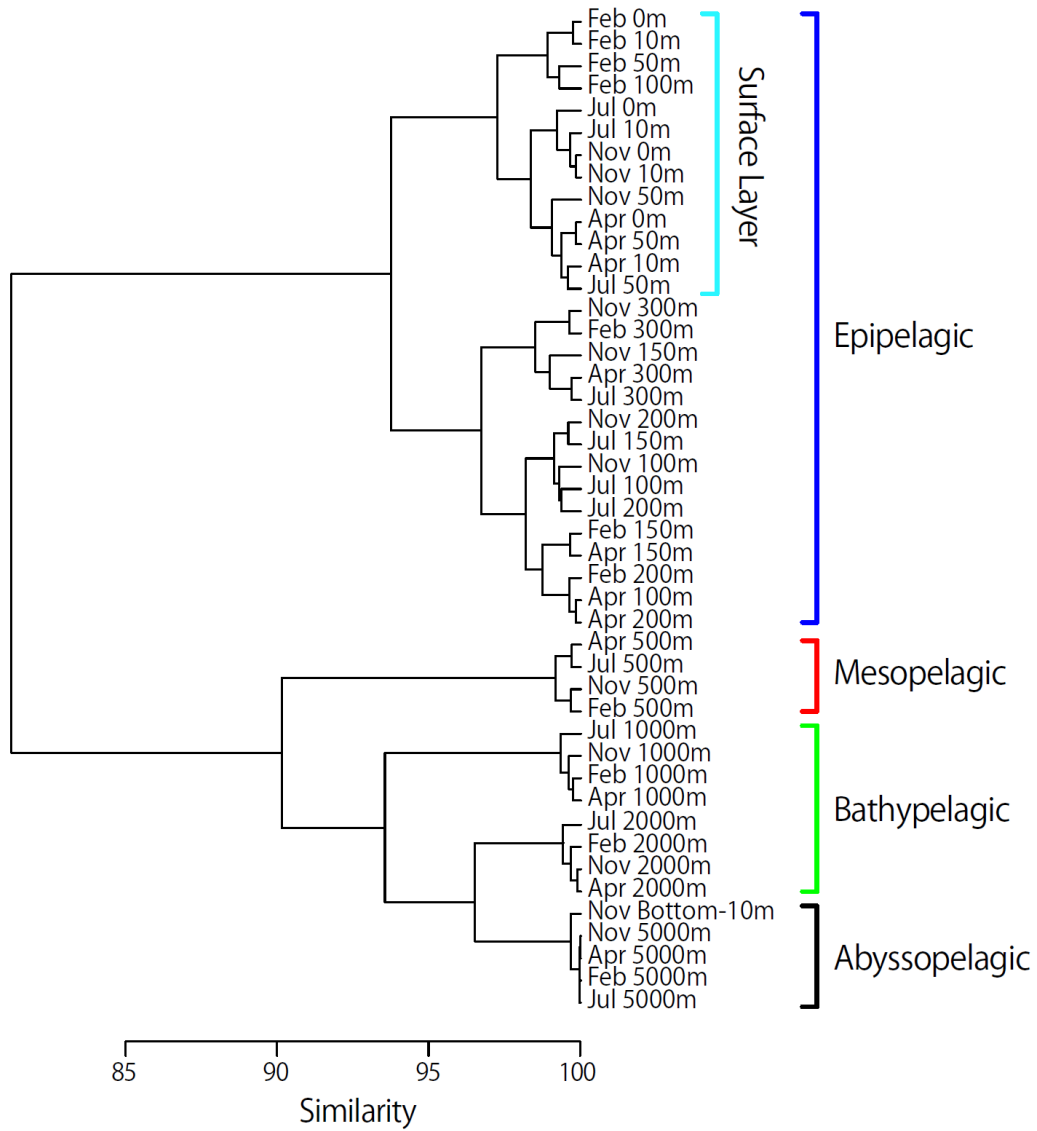

**Fig S1.** Hierarchical clustering based on the Bray-Curtis similarity of samples used for DNA analysis with environmental variables (temperature, salinity, dissolved oxygen, and nitrate concentration).

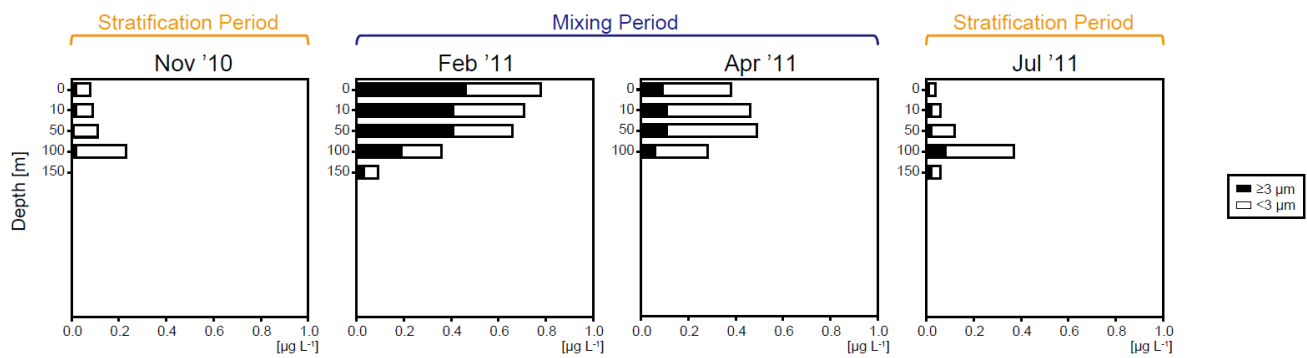

**Fig S2.** Vertical distribution of the chl *a* concentration in each month. Closed and open bars indicate the  $\geq 3\text{-}\mu\text{m}$  and  $< 3\text{-}\mu\text{m}$  fractions, respectively.

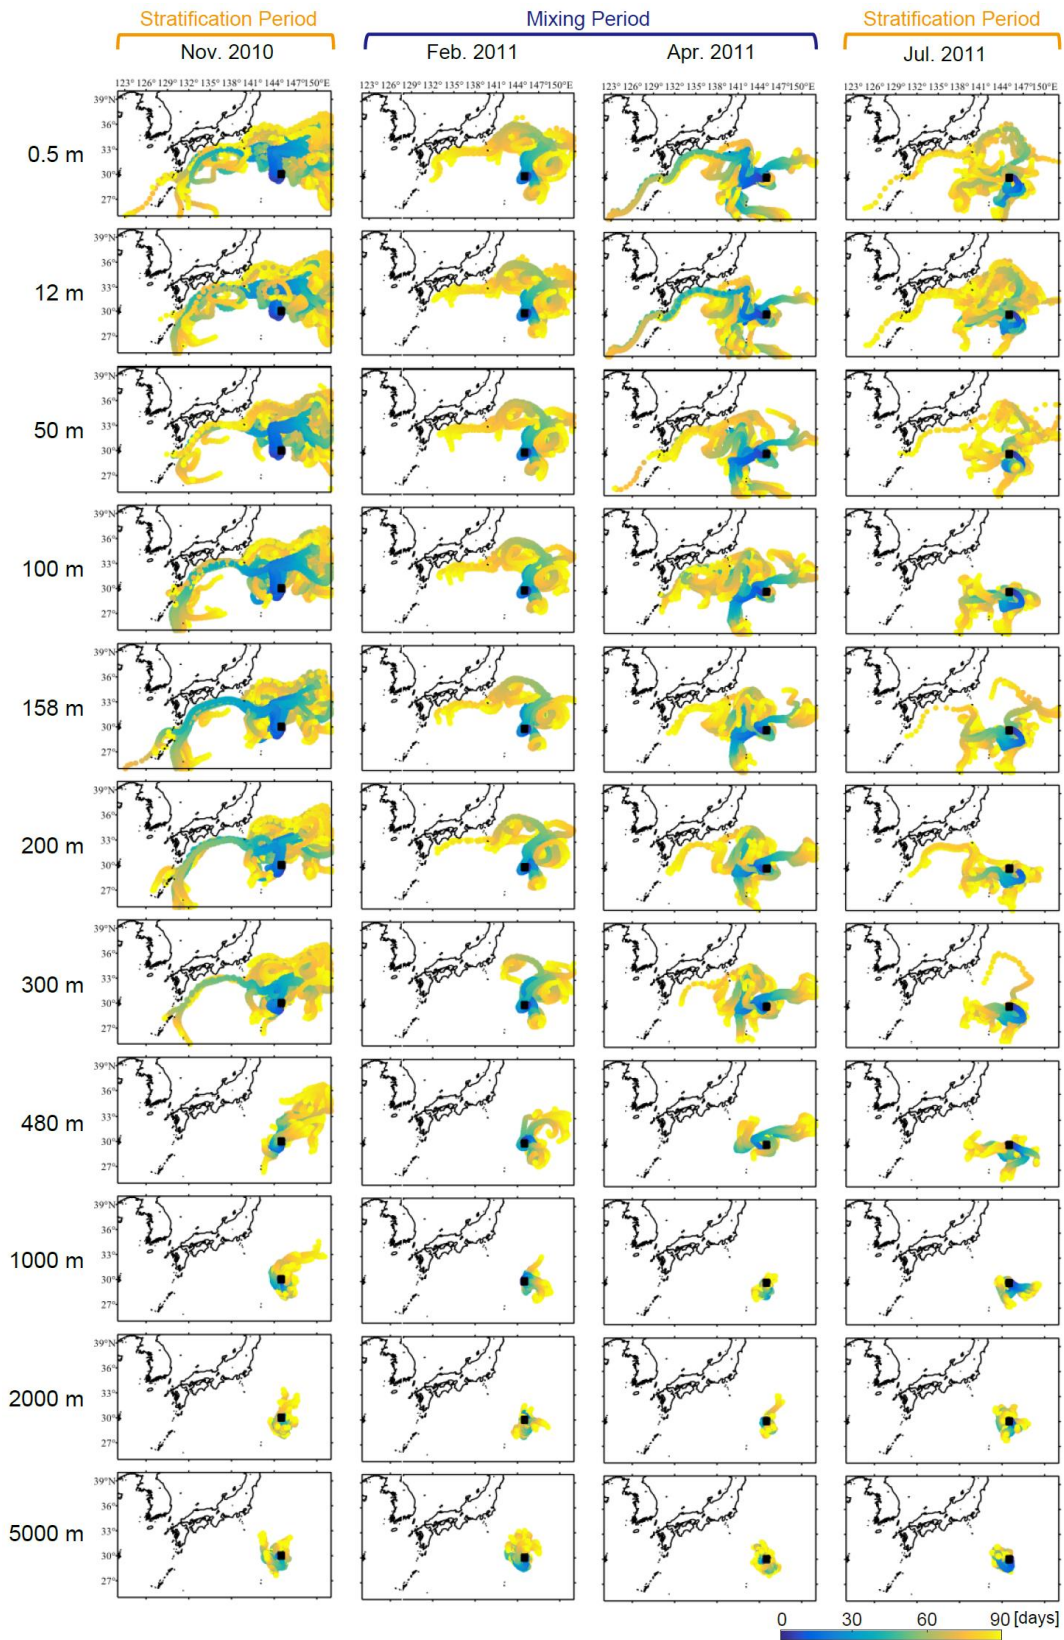

**Fig S3.** Back trajectories of particles present at station S1 at the various sampling depths over the 90 days prior to sampling at each month.

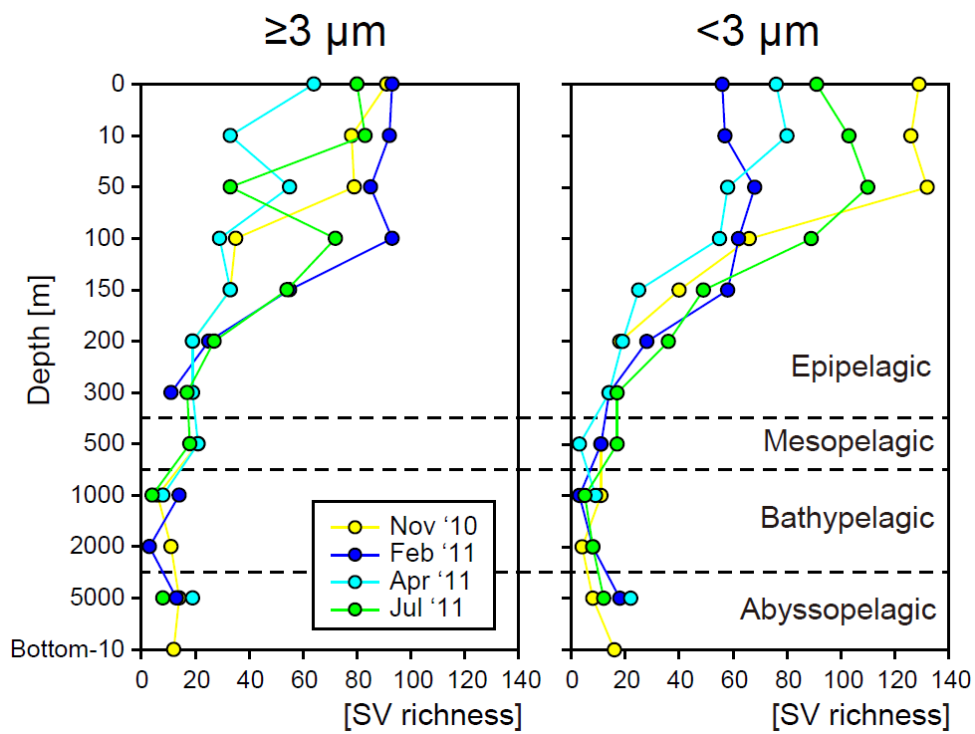

**Fig S4.** Vertical distributions of the SV number for each month and size fraction.

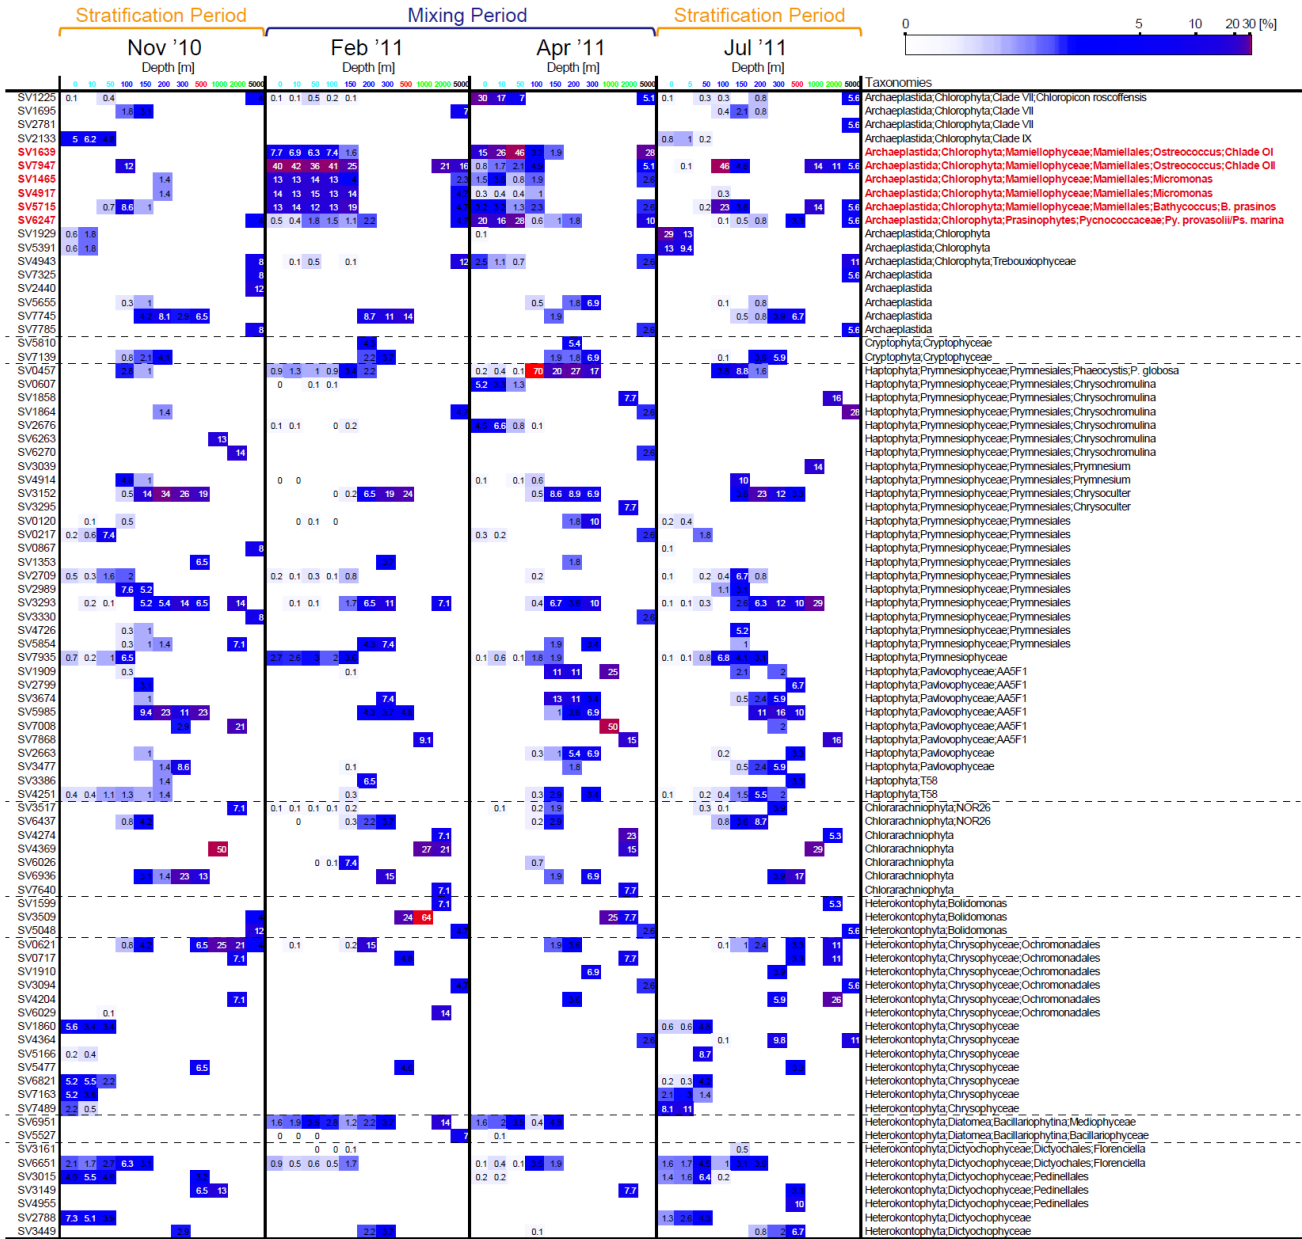

**Fig S5.** Heatmap of the relative abundance of representative SVs ( $\geq 5\%$  of total reads at a given depth) in the  $< 3\text{-}\mu\text{m}$  size fraction. The relative abundance is shown in white when greater than 5%.
